# Supplementary material for: Functional effect of grapevine 1-deoxy-D-xylulose 5-phosphate synthase substitution K284N on Muscat flavour formation
Source: Oxford University Press journal article supplement (doi:10.1093/jxb/err231), 2011-08-24
Supplement: err231_Supplementary_Data.zip [file err231_Supplementary_Data.zip]

Archive with 1 entries (1 files):
- 00062273_file001.pdf
